# Supplementary material
Source: ML conference proceedings conference paper supplement (https://openreview.net/forum?id=hNjSvgFTbp)

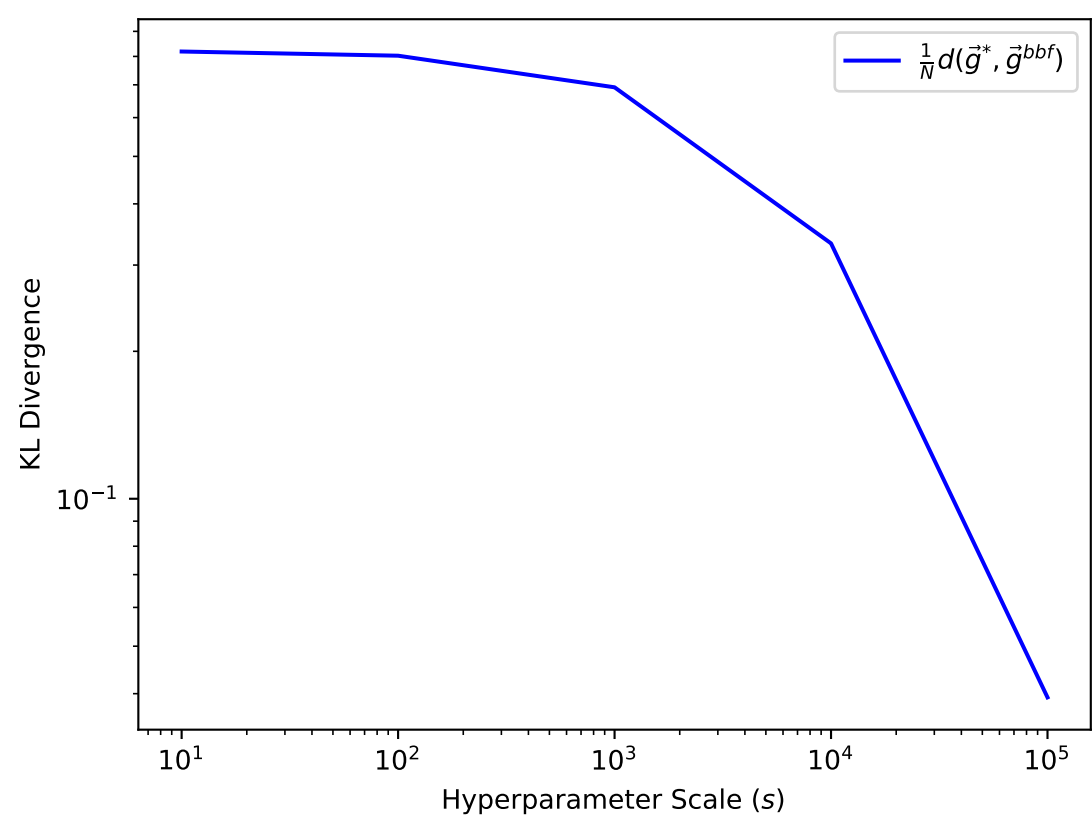

Supplement: supplementary_material [file agnews_BBF_consistency.pdf › supplementary files/figures/agnews_BBF_consistency.pdf]

KL Divergence

$10^{-1}$

$\frac{1}{N}d(\vec{g}^*, \vec{g}^{bbf})$

$10^1$

$10^2$

$10^3$

$10^4$

$10^5$

Hyperparameter Scale (s)

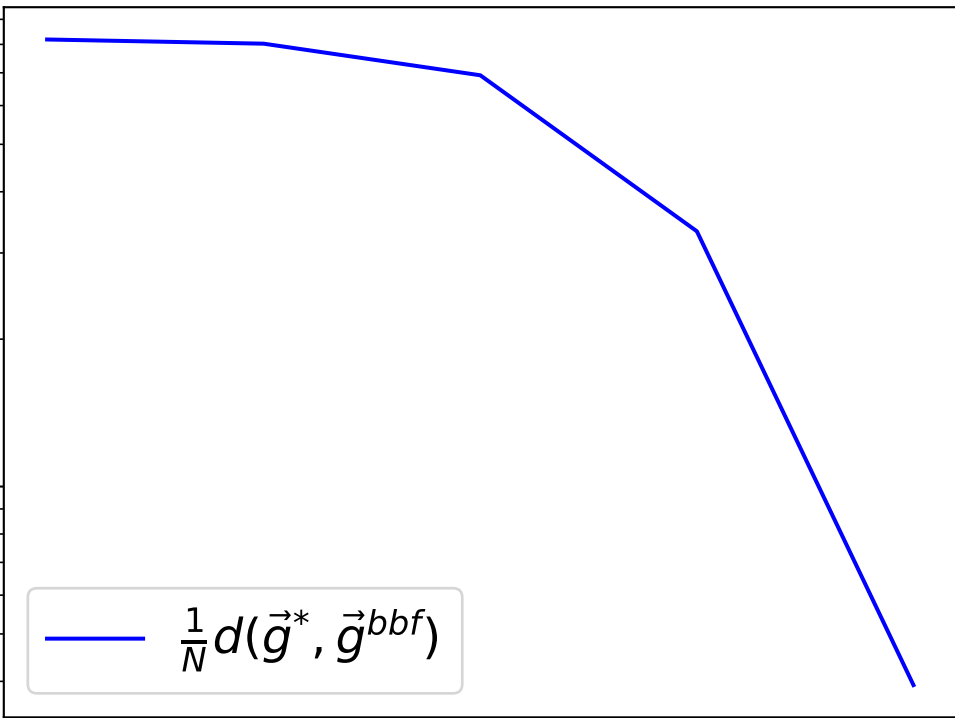

Supplement: supplementary_material [file agnews_BBF_consistency_enlarged.pdf › supplementary files/figures/agnews_BBF_consistency_enlarged.pdf]

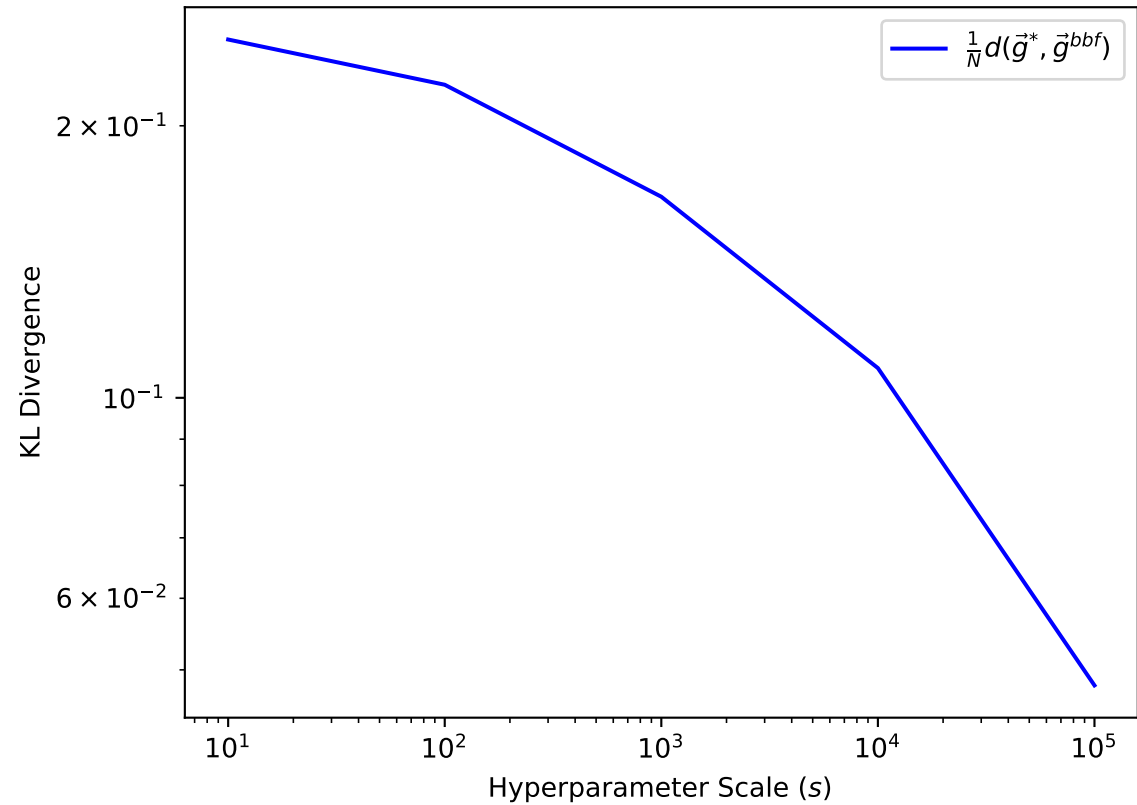

Supplement: supplementary_material [file cdr_BBF_consistency.pdf › supplementary files/figures/cdr_BBF_consistency.pdf]

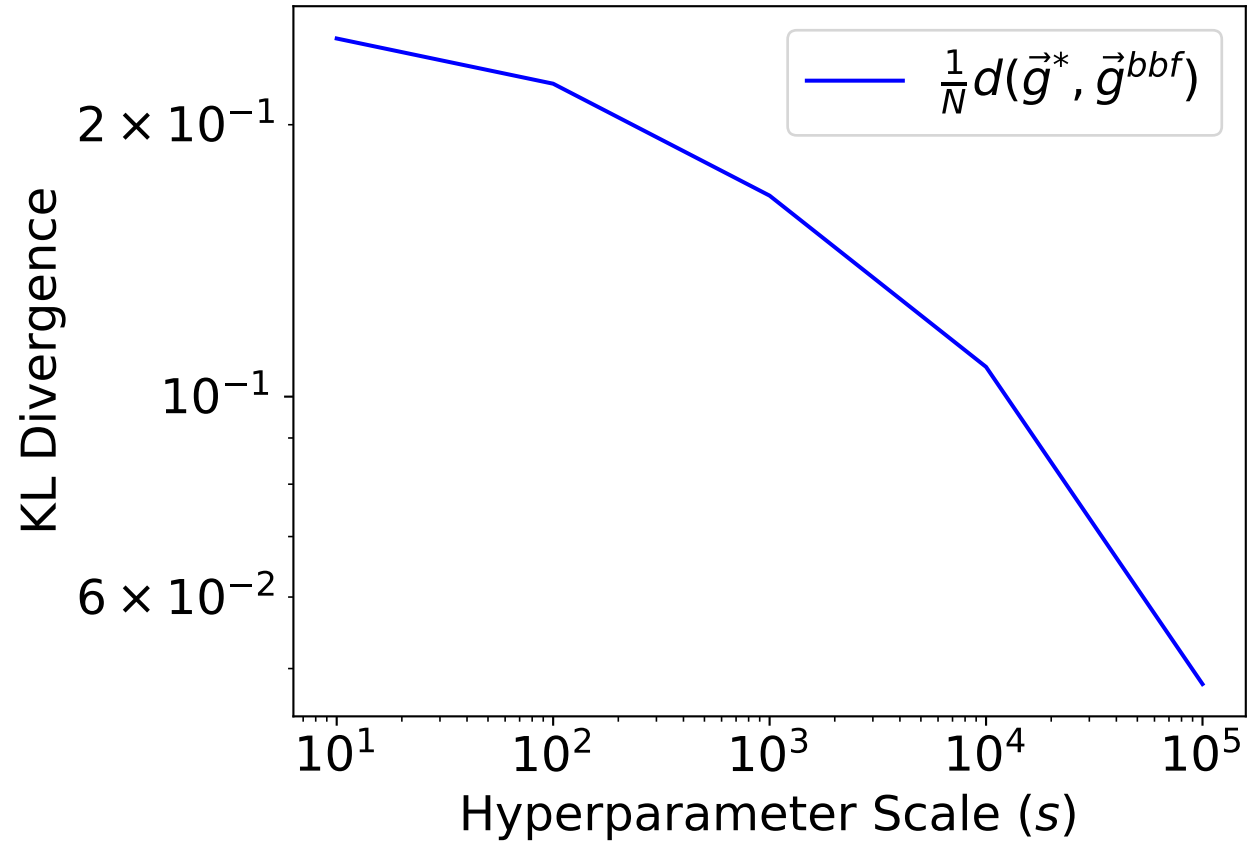

Supplement: supplementary_material [file cdr_BBF_consistency_enlarged.pdf › supplementary files/figures/cdr_BBF_consistency_enlarged.pdf]

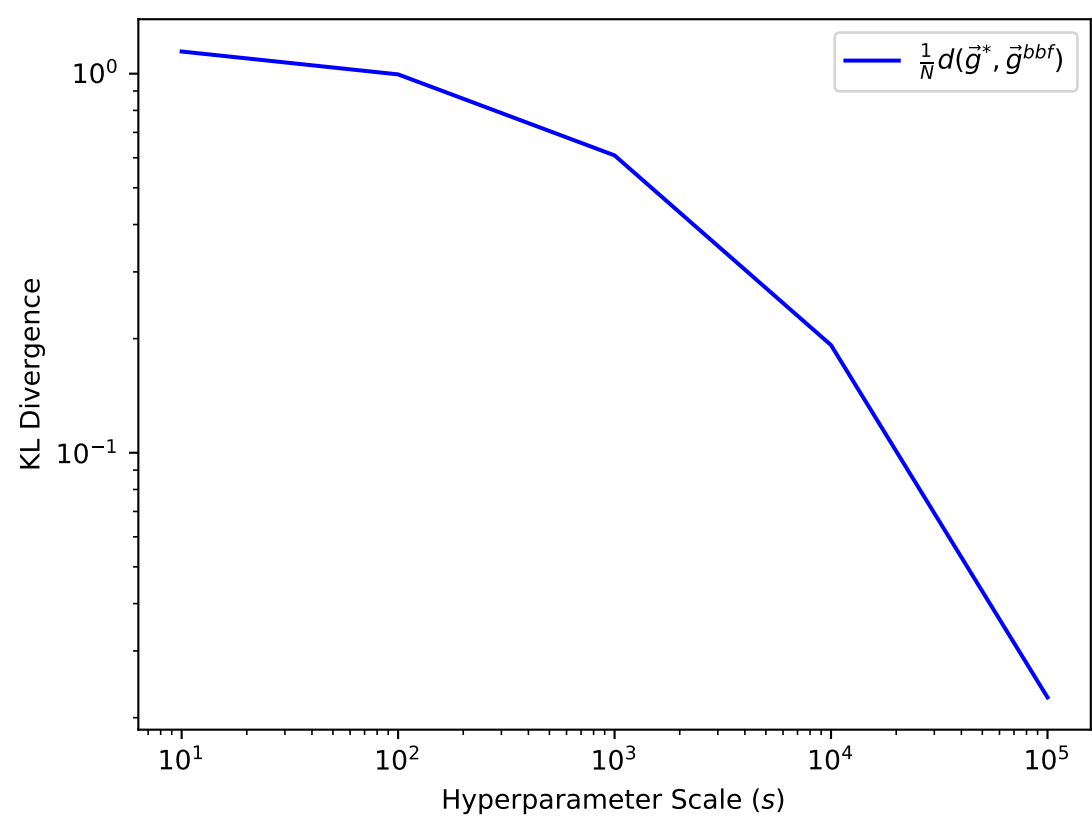

Supplement: supplementary_material [file chemprot_BBF_consistency.pdf › supplementary files/figures/chemprot_BBF_consistency.pdf]

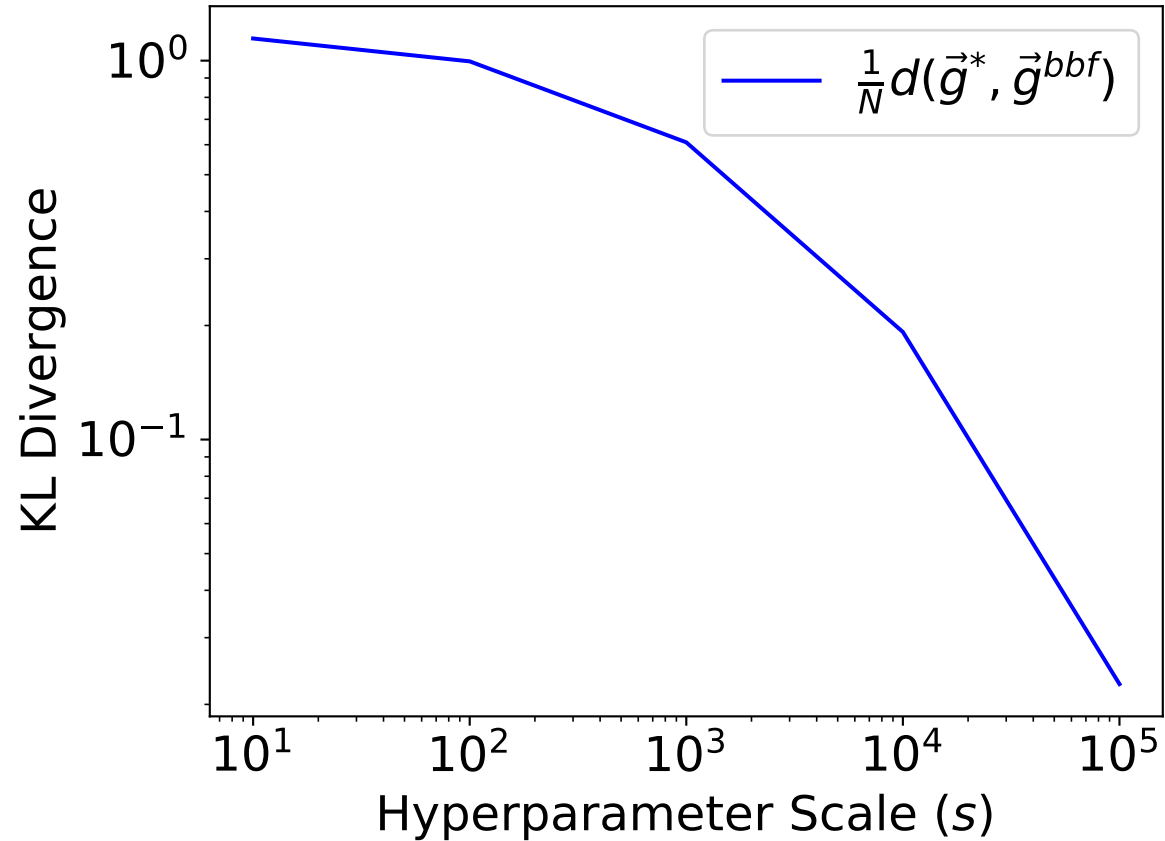

Supplement: supplementary_material [file chemprot_BBF_consistency_enlarged.pdf › supplementary files/figures/chemprot_BBF_consistency_enlarged.pdf]

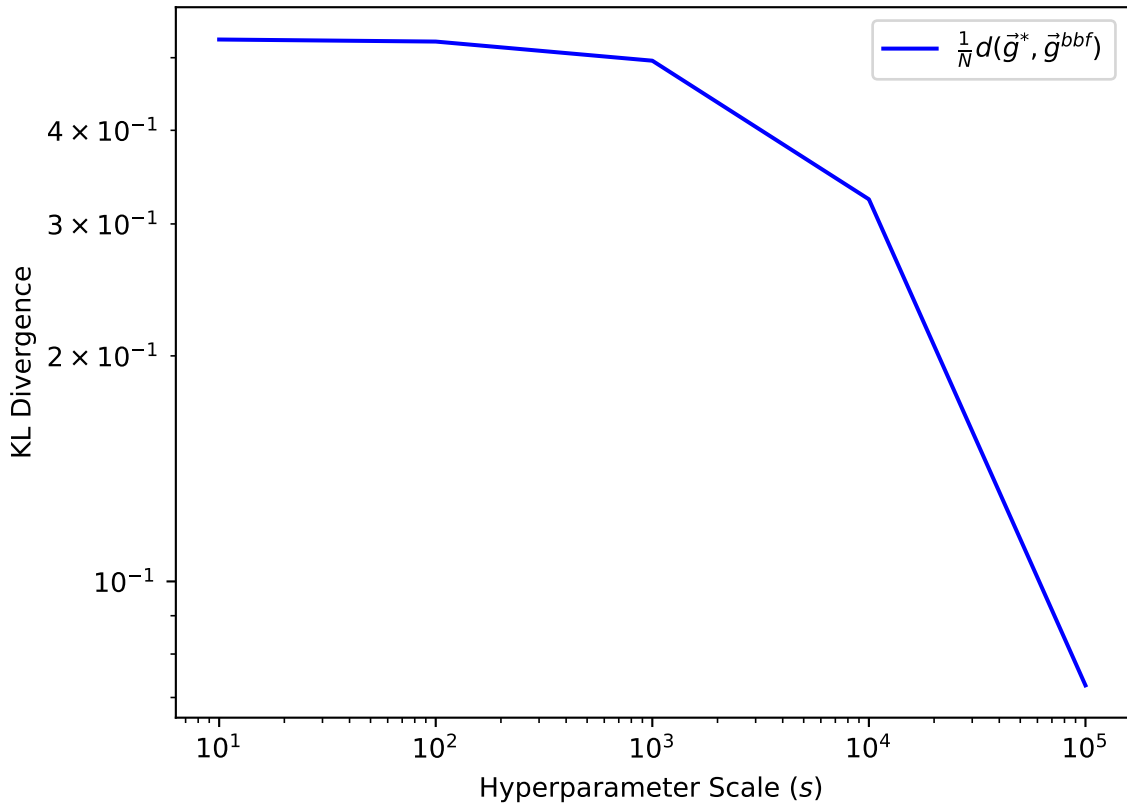

Supplement: supplementary_material [file commercial_BBF_consistency.pdf › supplementary files/figures/commercial_BBF_consistency.pdf]

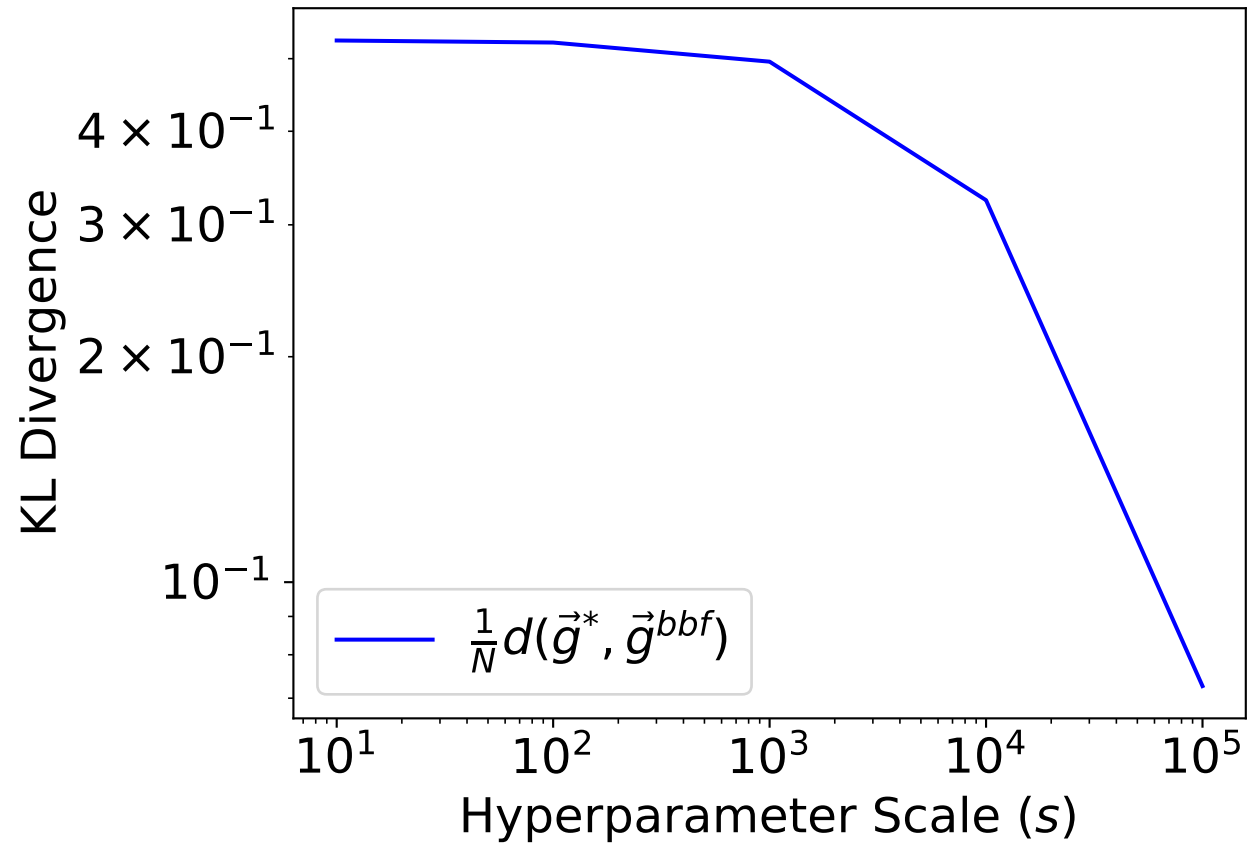

Supplement: supplementary_material [file commercial_BBF_consistency_enlarged.pdf › supplementary files/figures/commercial_BBF_consistency_enlarged.pdf]

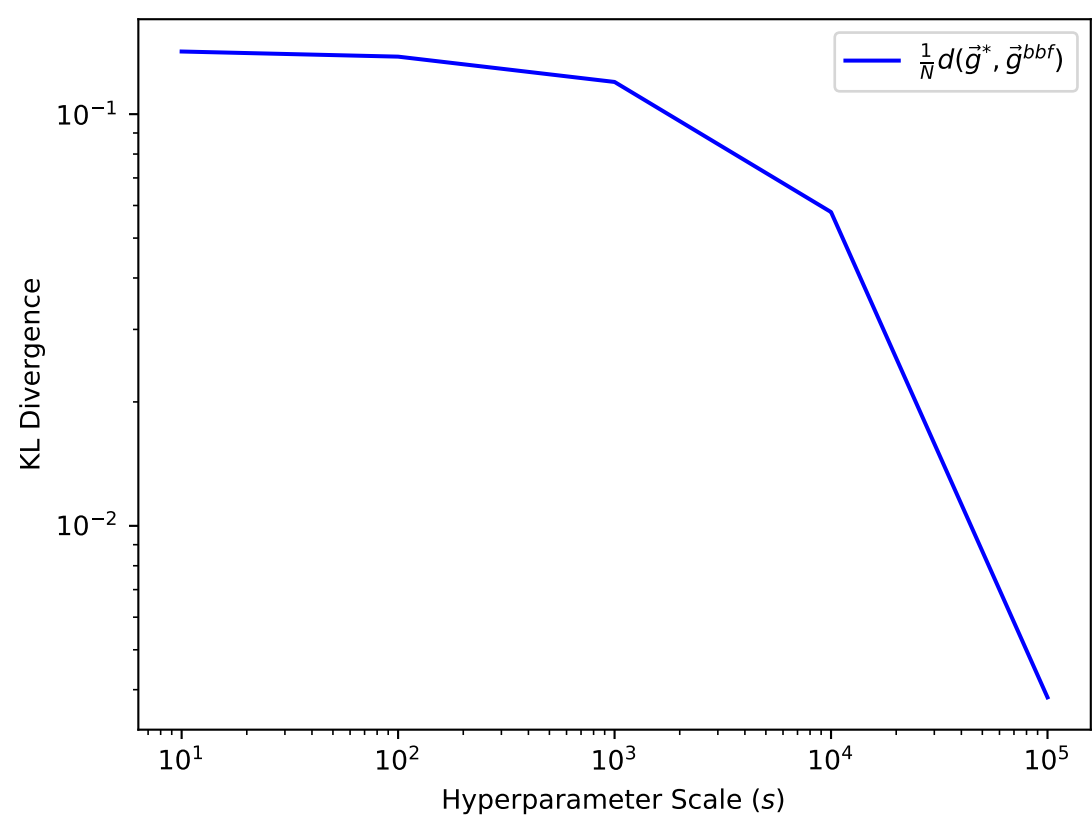

Supplement: supplementary_material [file imdb_BBF_consistency.pdf › supplementary files/figures/imdb_BBF_consistency.pdf]

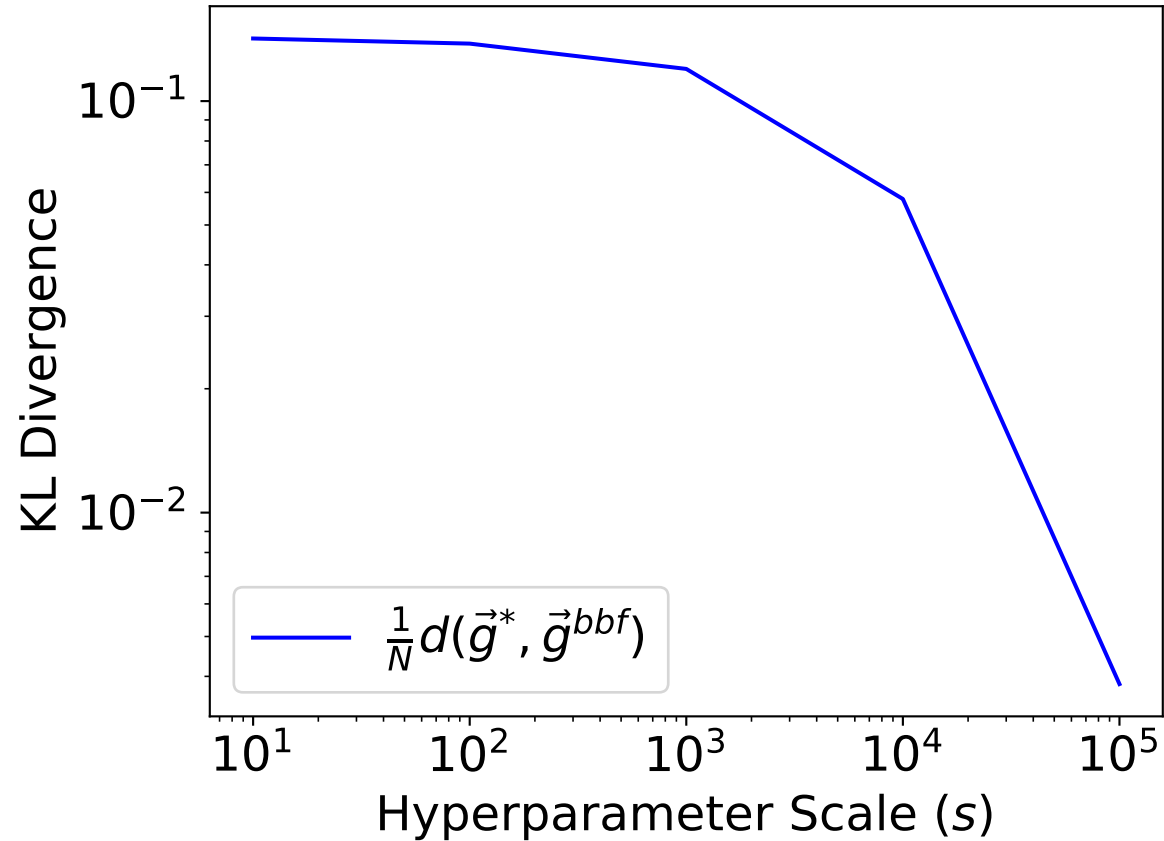

Supplement: supplementary_material [file imdb_BBF_consistency_enlarged.pdf › supplementary files/figures/imdb_BBF_consistency_enlarged.pdf]

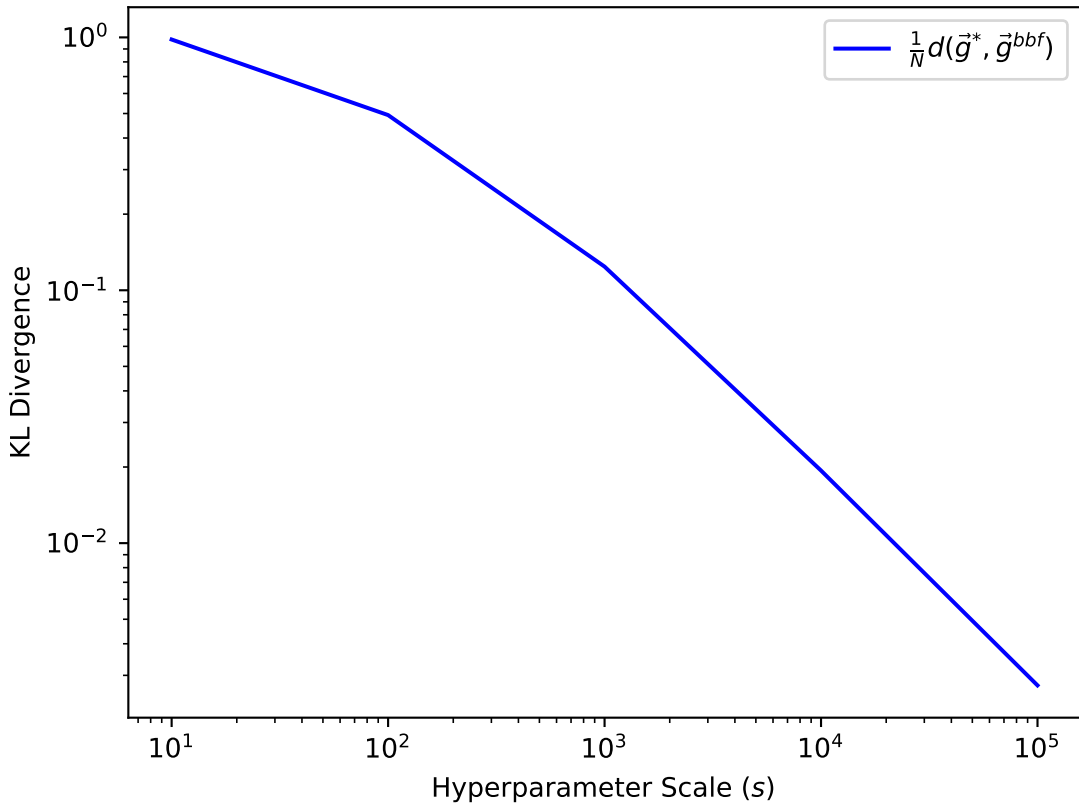

Supplement: supplementary_material [file semeval_BBF_consistency.pdf › supplementary files/figures/semeval_BBF_consistency.pdf]

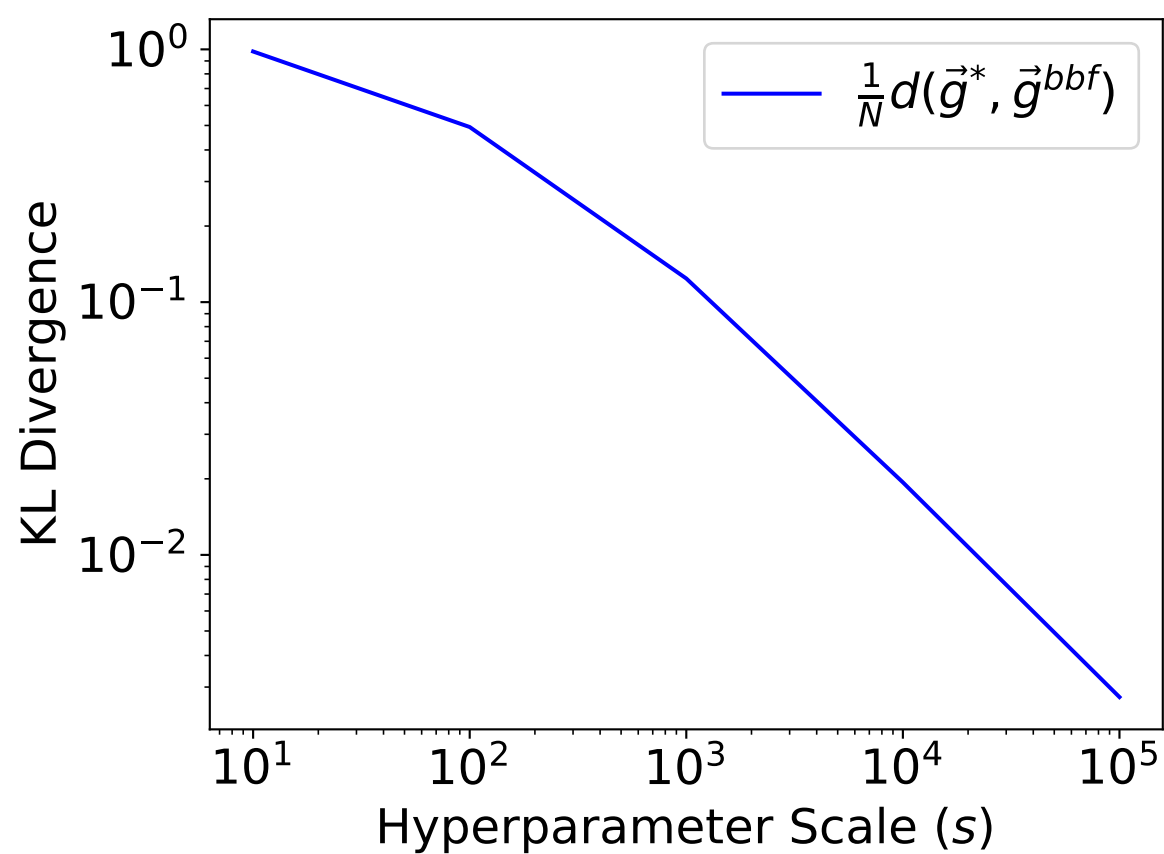

Supplement: supplementary_material [file semeval_BBF_consistency_enlarged.pdf › supplementary files/figures/semeval_BBF_consistency_enlarged.pdf]

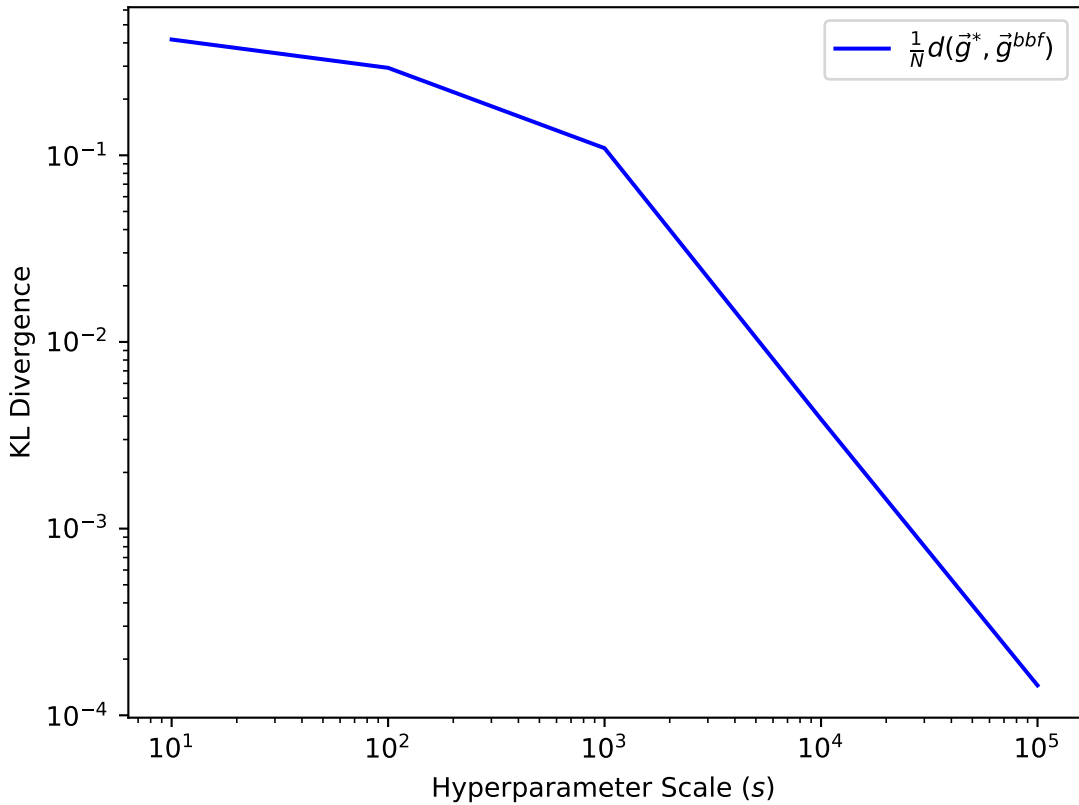

Supplement: supplementary_material [file sms_BBF_consistency.pdf › supplementary files/figures/sms_BBF_consistency.pdf]

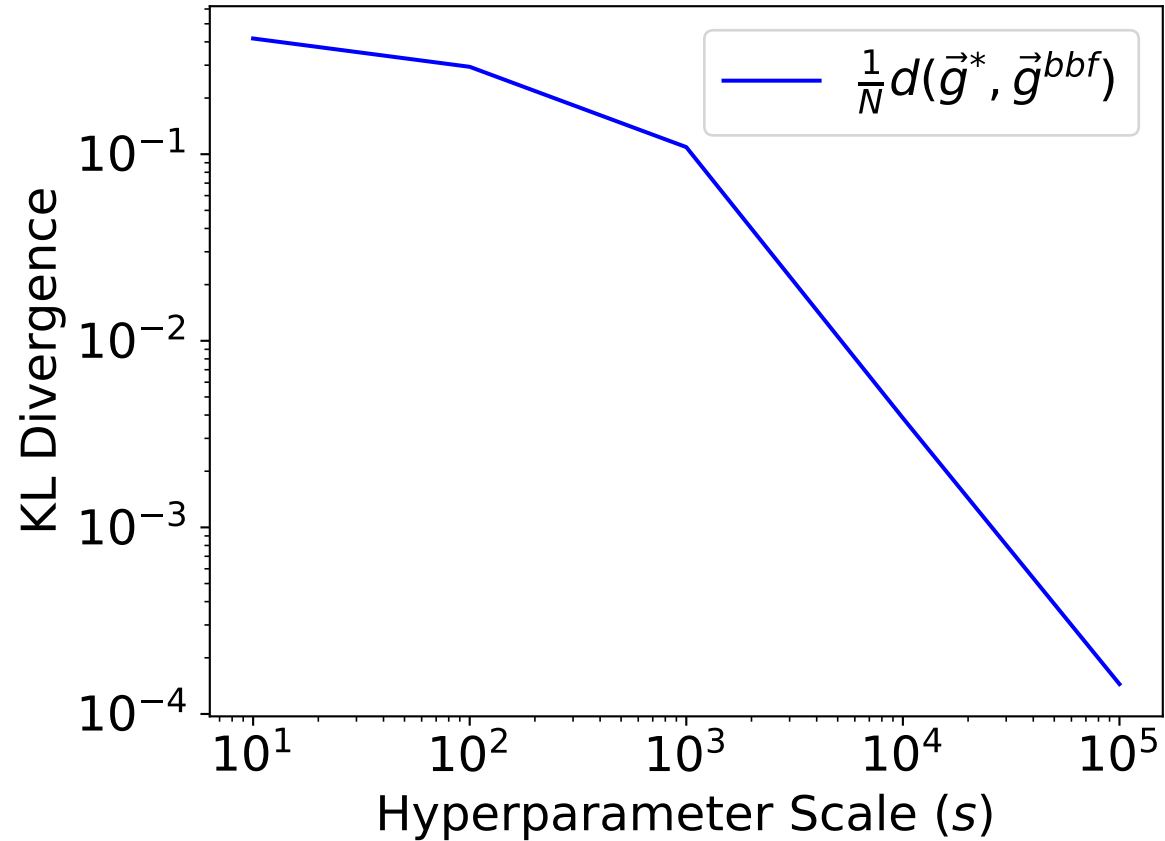

Supplement: supplementary_material [file sms_BBF_consistency_enlarged.pdf › supplementary files/figures/sms_BBF_consistency_enlarged.pdf]

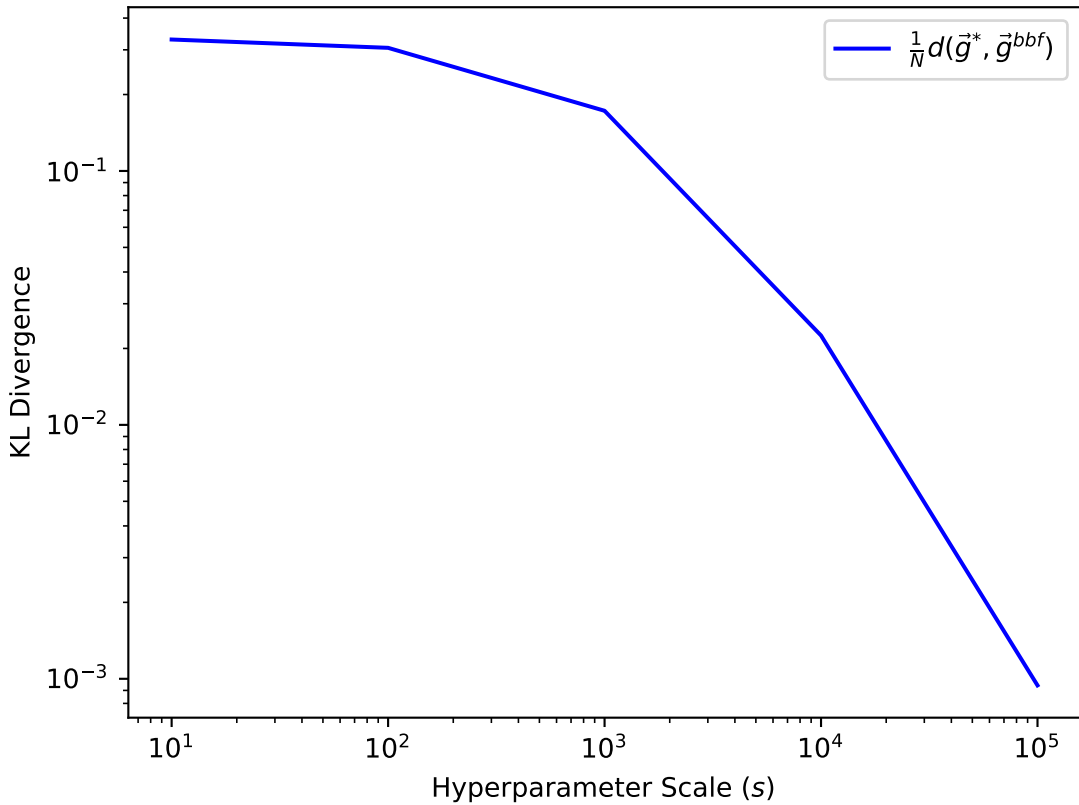

Supplement: supplementary_material [file tennis_BBF_consistency.pdf › supplementary files/figures/tennis_BBF_consistency.pdf]

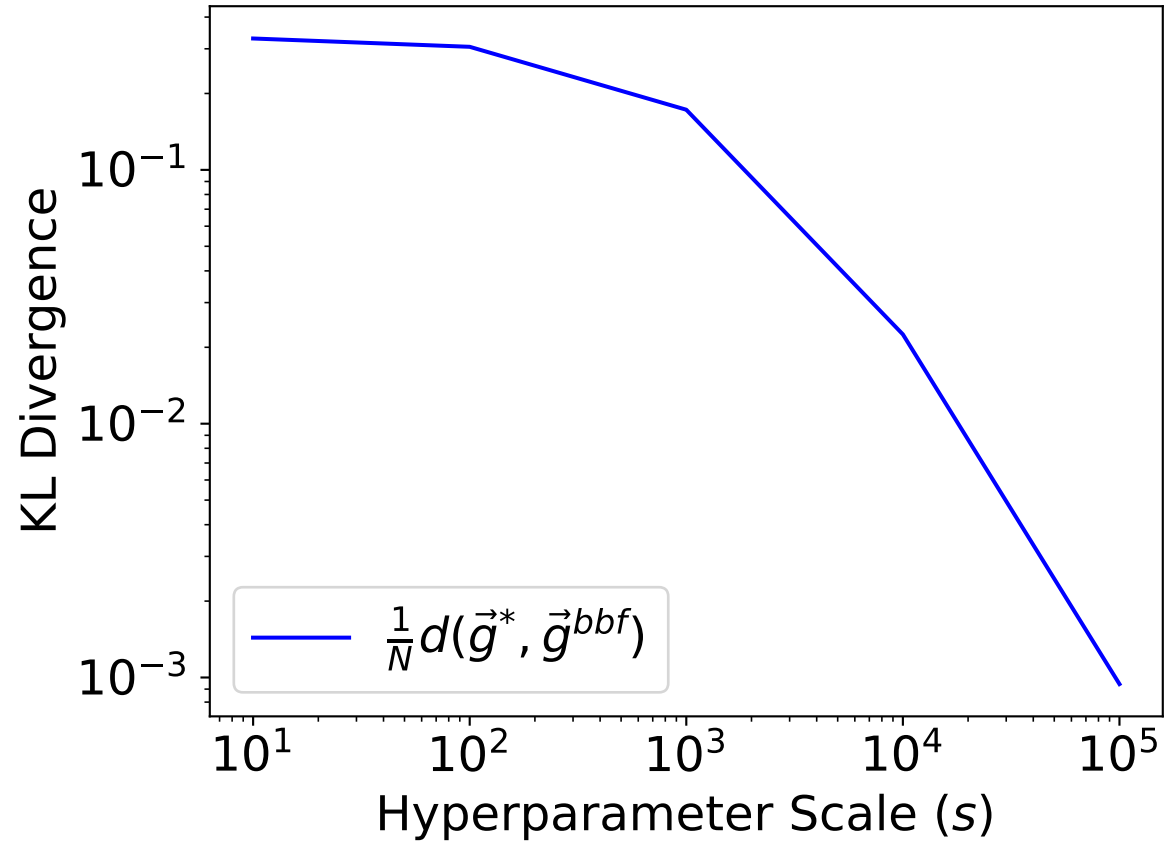

Supplement: supplementary_material [file tennis_BBF_consistency_enlarged.pdf › supplementary files/figures/tennis_BBF_consistency_enlarged.pdf]

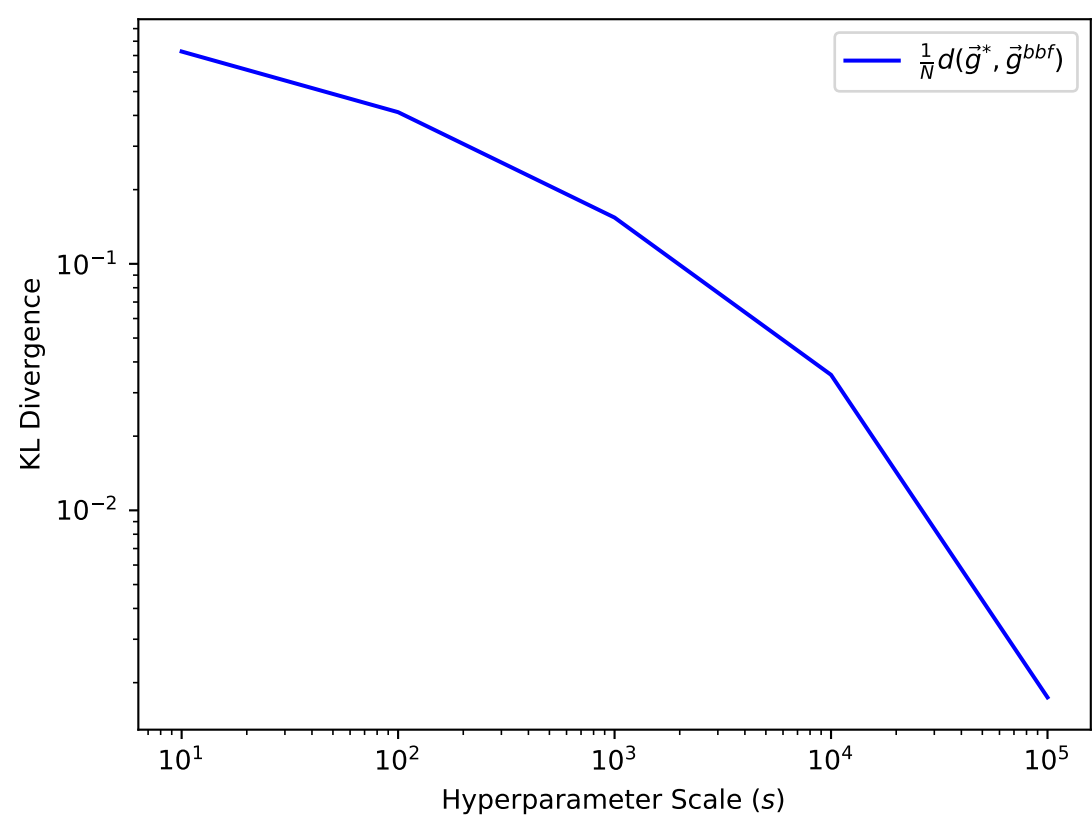

Supplement: supplementary_material [file trec_BBF_consistency.pdf › supplementary files/figures/trec_BBF_consistency.pdf]

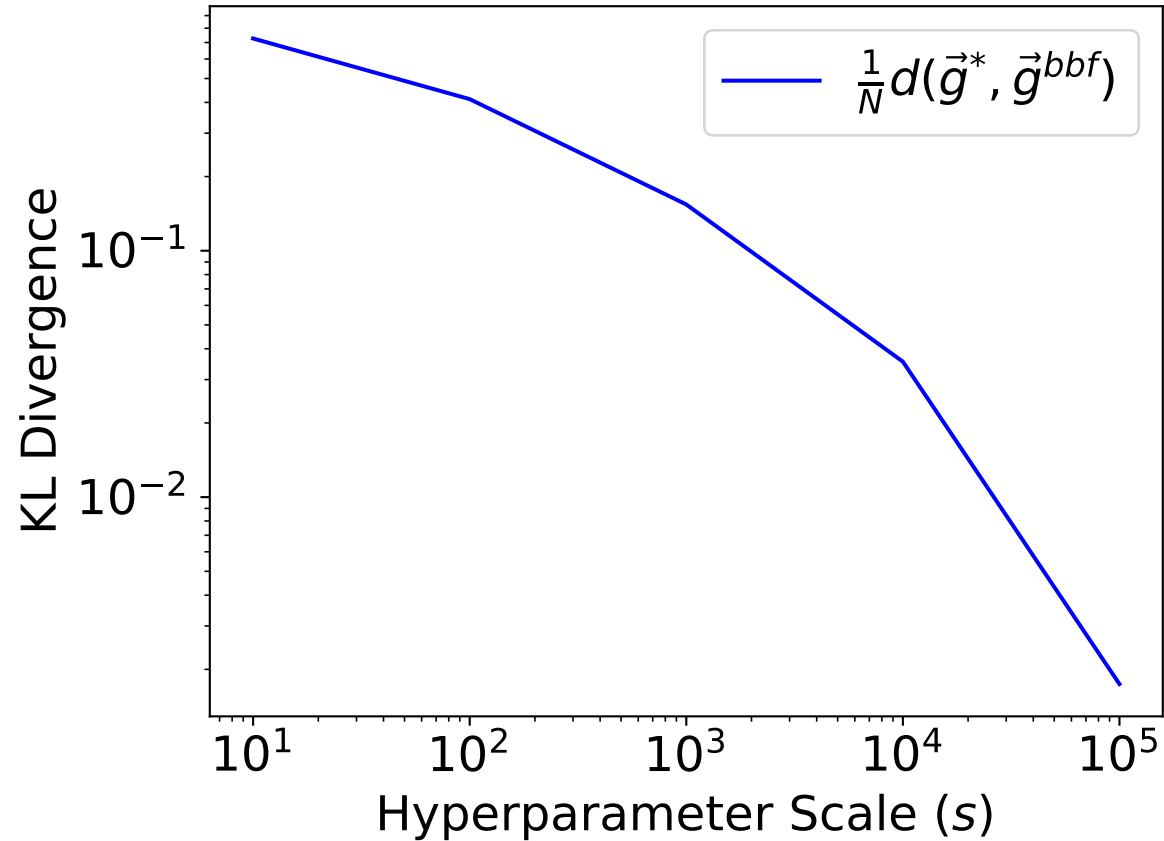

Supplement: supplementary_material [file trec_BBF_consistency_enlarged.pdf › supplementary files/figures/trec_BBF_consistency_enlarged.pdf]

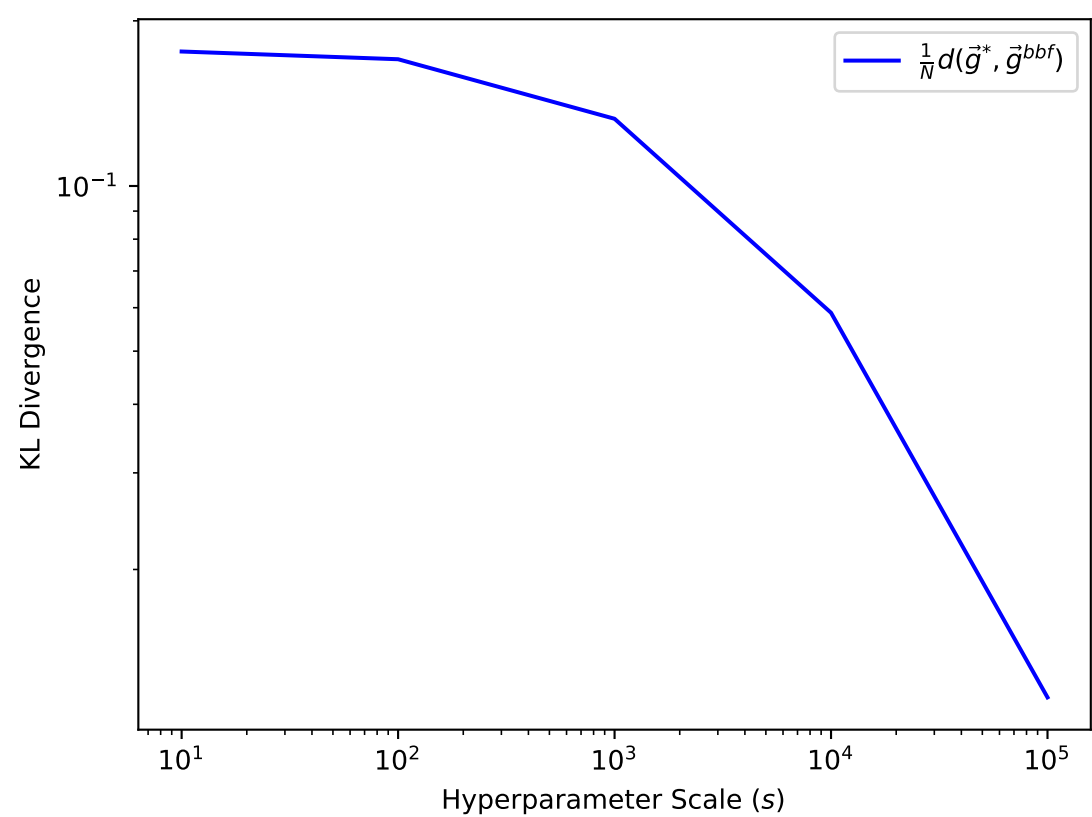

Supplement: supplementary_material [file yelp_BBF_consistency.pdf › supplementary files/figures/yelp_BBF_consistency.pdf]

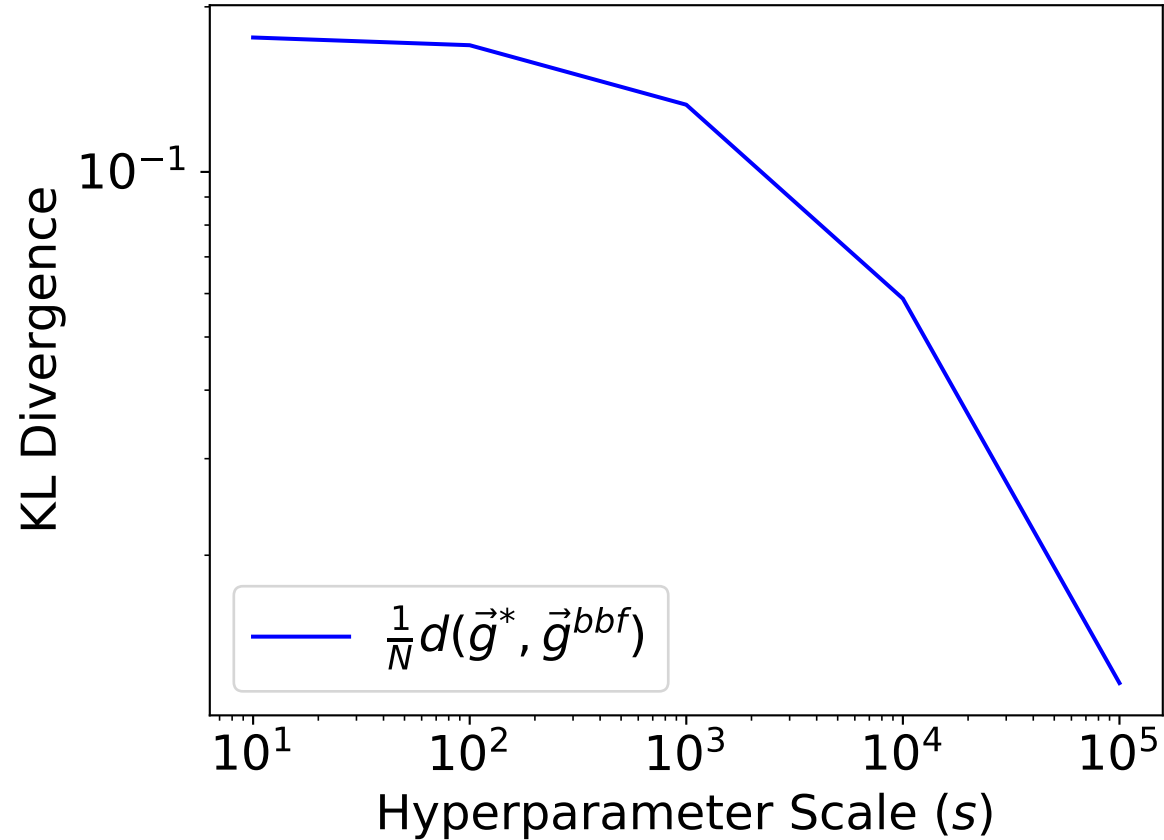

Supplement: supplementary_material [file yelp_BBF_consistency_enlarged.pdf › supplementary files/figures/yelp_BBF_consistency_enlarged.pdf]

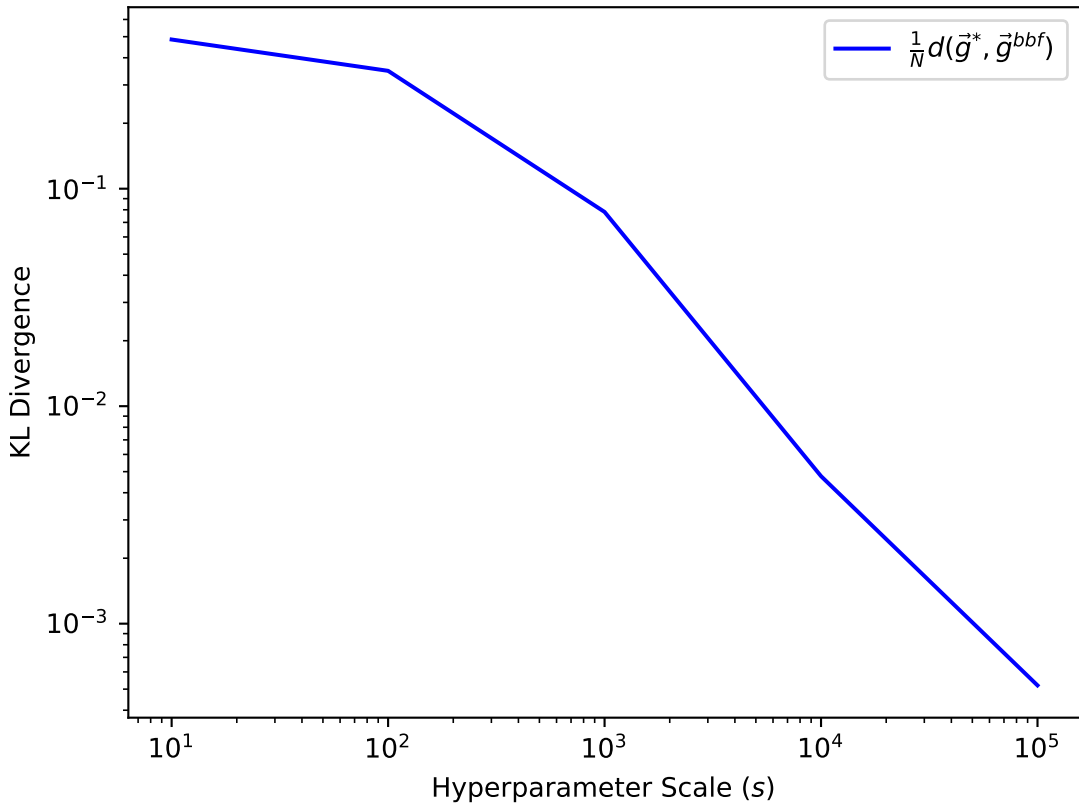

Supplement: supplementary_material [file youtube_BBF_consistency.pdf › supplementary files/figures/youtube_BBF_consistency.pdf]

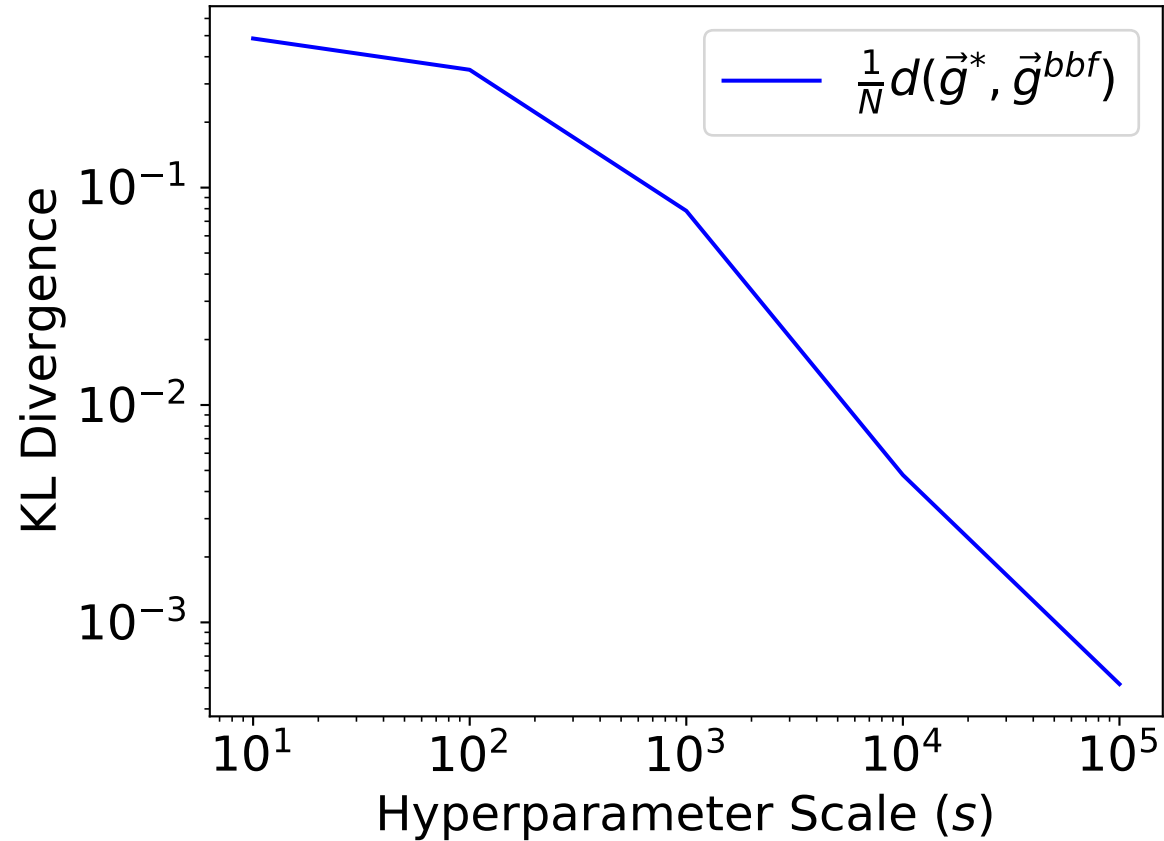

Supplement: supplementary_material [file youtube_BBF_consistency_enlarged.pdf › supplementary files/figures/youtube_BBF_consistency_enlarged.pdf]
